# Supplementary material for: Anti-Angiogenic Treatment in Pseudomyxoma Peritonei—Still a Strong Preclinical Rationale
Source: MDPI journal article supplement (doi:10.3390/cancers13112819), 2021-06-05
Supplement: s1 [file s1]

# Anti-Angiogenic Treatment in Pseudomyxoma Peritonei—Still a Strong Preclinical Rationale

Yvonne Andersson, Karianne G. Fleten, Torveig W. Abrahamsen, Wenche Reed, Ben Davidson and Kjersti Flatmark

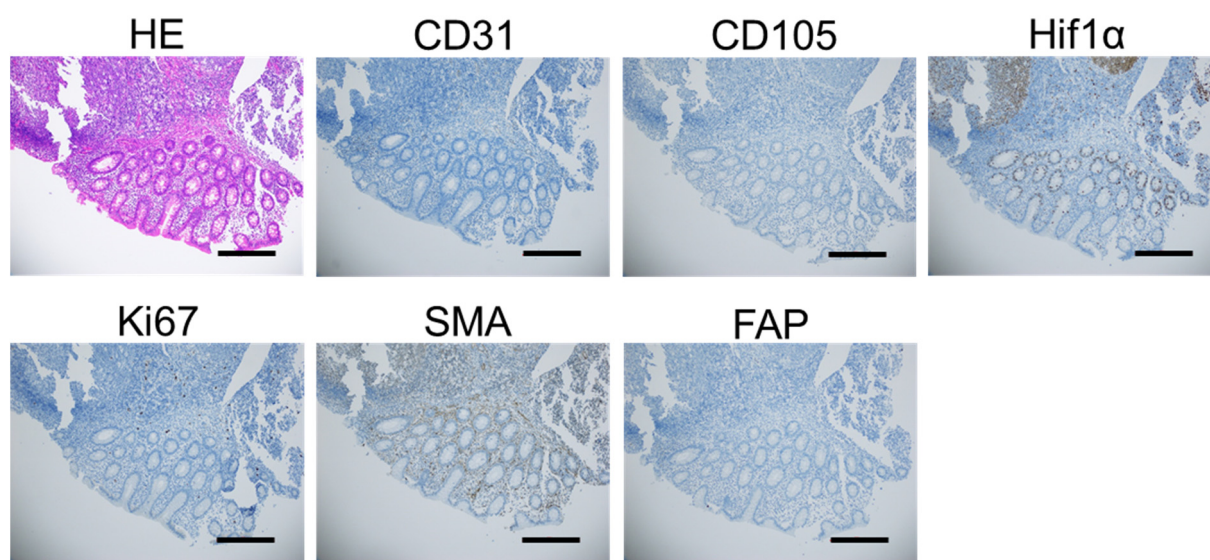

**Figure S1.** Immunohistochemical images showing HE, CD31, CD105, Hif1 $\alpha$ , Ki67, SMA and FAP staining in normal appendix as a control to stainings shown in Figure 1. Scale bar indicate 300  $\mu$ M.

**Table S1.** Properties of the PDX models used in experiments: Patient characteristics; immunohistochemistry (IHC); mutation analysis by targeted next-generation sequencing. The number of immunoreactive tumor cells was semi-quantitatively evaluated: 0 (no positive cells); 1 = 1% to 5%; 2 = 6% to 25%; 3 = 26% to 75%; and 4 = 75% to 100%. The data was previously published in [1–3].

| Patient Characteristics | PMP-2 | PMCA-1 | PMCA-3 |
|-------------------------|-------|--------|--------|
| Age                     | 56    | 68     | 62     |
| Gender                  | F     | F      | M      |
| <b>IHC parameters</b>   |       |        |        |
| CK20                    | 4     | 0      | 4      |
| CK7                     | 4     | 4      | 1      |
| CEA                     | 4     | 4      | 4      |
| Vimentin                | 0     | 0      | 0      |
| Ki67                    | 2     | 3      | 3      |
| VEGF                    | 0     | 0      | 0      |
| <b>Mutations</b>        |       |        |        |
| KRAS                    | G12V  | G12A   | WT     |
| GNAS                    | R201C | WT     | R201C  |
| BRAF                    | WT    | WT     | V600E  |

## References

- Flatmark, K.; Davidson, B.; Kristian, A.; Stavnes, H.T.; Førsund, M.; Reed, W. Exploring the peritoneal surface malignancy phenotype—a pilot immunohistochemical study of human pseudomyxoma peritonei and derived animal models. *Human Pathology* **2010**, *41*, 1109–1119.

2. Flatmark, K.; Reed, W.; Halvorsen, T.; Sorensen, O.; Wiig, J.N.; Larsen, S.G.; Fodstad, O.; Giercksky, K.E. Pseudomyxoma peritonei--two novel orthotopic mouse models portray the PMCA-I histopathologic subtype. *BMC Cancer* **2007**, *7*, 116, doi:10.1186/1471-2407-7-116.
3. Fleten, K.G.; Lund-Andersen, C.; Waagene, S.; Abrahamsen, T.W.; Mørch, Y.; Boye, K.; Torgunrud, A.; Flatmark, K. Experimental Treatment of Mucinous Peritoneal Metastases Using Patient-Derived Xenograft Models. *Translational oncology* **2020**, *13*, 100793.
